# Supplementary material for: Precision Medicine Is Changing the Roles of Healthcare Professionals, Scientists, and Research Staff: Learnings from a Childhood Cancer Precision Medicine Trial
Source: MDPI journal article supplement (doi:10.3390/jpm13071033), 2023-06-23
Supplement: s1 [file s1]

**Supplementary Table S2. PRISM hospital site recruitment (November 2020)**

| <b>Site</b>                                | <b>Patients, n (%)</b> |
|--------------------------------------------|------------------------|
| Royal Children's Hospital, Melbourne       | 76 (18.7)              |
| Sydney Children's Hospital                 | 75 (18.7)              |
| The Children's Hospital, Westmead          | 75 (18.7)              |
| Queensland Children's Hospital             | 57 (14.2)              |
| Perth Children's Hospital                  | 43 (10.7)              |
| Monash Children's Hospital, Melbourne      | 34 (8.5)               |
| John Hunter Children's Hospital, Newcastle | 25 (6.2)               |
| Women's and Children's Hospital, Adelaide  | 16 (4)                 |
| Total                                      | 401                    |
